# Supplementary material for: Reduced chromatin accessibility underlies gene expression differences in homologous chromosome arms of hexaploid wheat and diploid Aegilops tauschii
Source: bioRxiv or medRxiv preprint supplement (doi:10.1101/571133), 2019-04-18
Supplement: Supplementary file [file media-2.pdf]

Additional File 2. Supplementary Figures and Tables

A

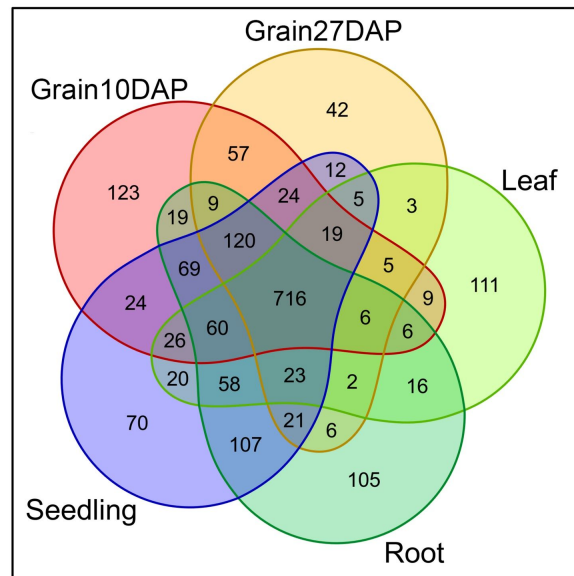

B

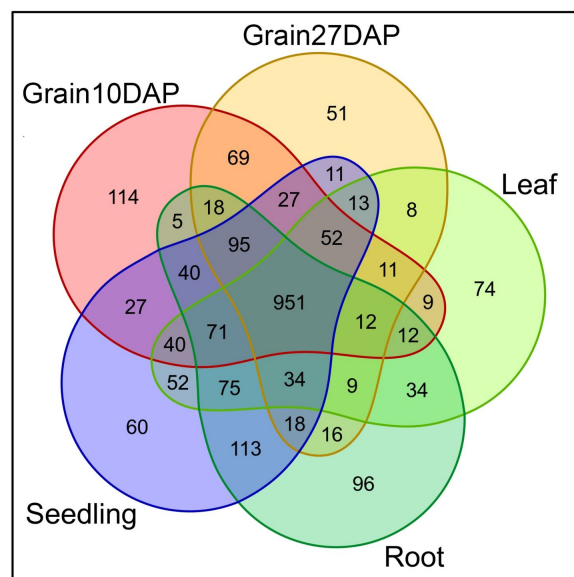

Figure S1 Expression profiles of syntenic genes of *Triticum aestivum* Paragon 3DL and *Aegilops tauschii* AL8/78 3L in five tissues.

Syntenic genes expressed with TPM $\geq$ 1 from wheat 3DL (1,893 genes, **A**) and *Ae. tauschii* chr3L (2,217 genes, **B**) among leaf, root, seedling, 10 DAP (Days After Pollination) and 27 DAP developing grain.

**A**

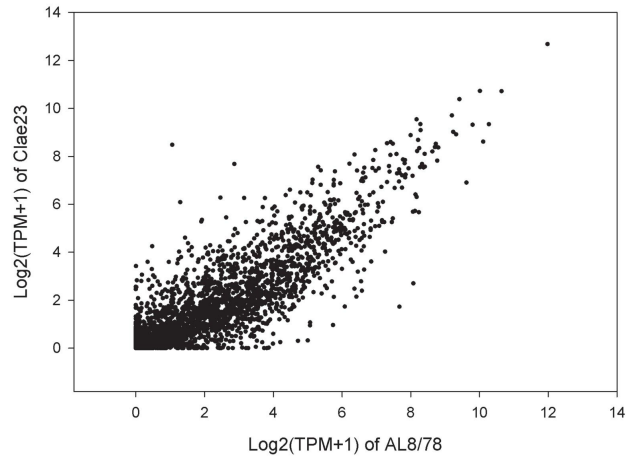

**B**

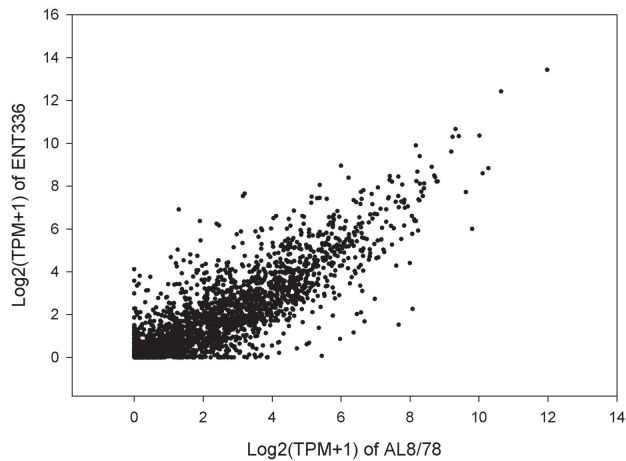

**Figure S2 Comparison of expression levels of between *Aegilops tauschii* varieties AL8/78, Clae23 and ENT336.**

To identify conserved differentially expressed genes (DEGs) between *Triticum aestivum* Paragon and *Aegilops tauschii* AL8/78, RNAseq data was generated from another two *Ae. tauschii* accessions, Clae23 (**A**) and ENT336 (**B**). TPM values showed a strong correlation between the pairs of accessions. ( $R^2 = 0.7964$  for Clae23 and  $0.7932$  for ENT336)

**A**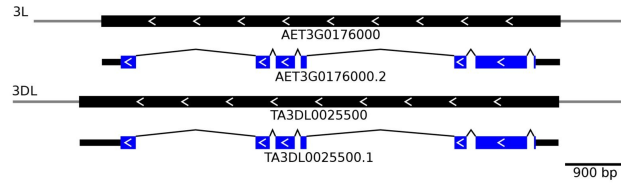**B**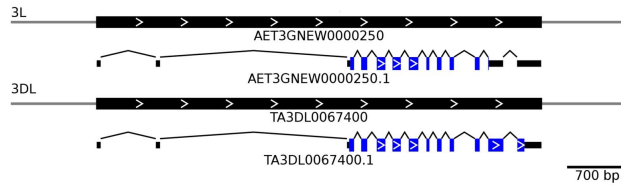**C**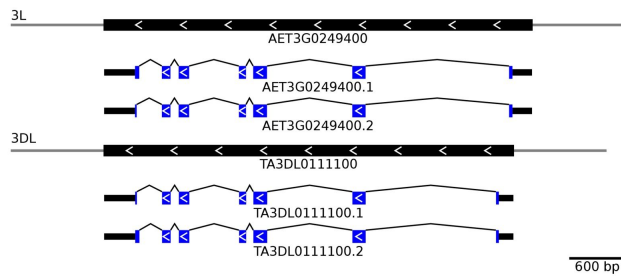**D**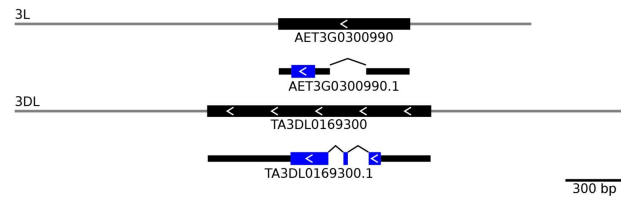**E**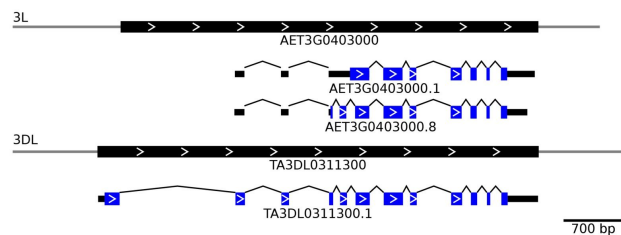

**Figure S3 Illustration of gene structure differences among 106 conserved DEGs between wheat and *Ae. tauschii*.**

**A** An example of wheat TA3DL0025500 with the same structure as its syntenic gene pair in *Ae. tauschii*, and 4 gene pairs with different gene structures: **B** TA3DL0067400 (alternate start codon); **C** TA3DL0111100 (alternate first exon); **D** TA3DL0169300 (exon 2 in *Ae. tauschii* missing); and **E** TA3DL0311300 (*Ae. tauschii* has premature stop codon).

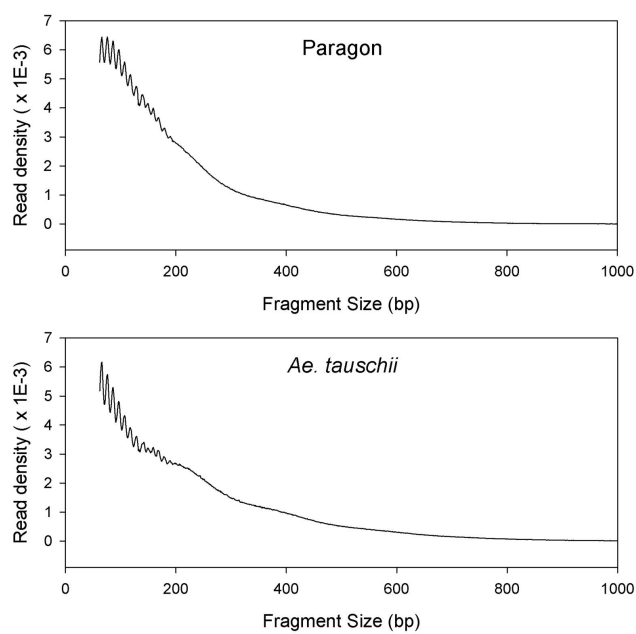

**Figure S4 Size distribution of ATAC-seq fragment lengths between *Triticum aestivum* Paragon and *Aegilops tauschii* AL8/78.**

The 10.5bp DNA pitch reflects the periodicity of right-handed helix in B-DNA. A trace of single and double nucleosome spacing can be seen in the 3L ATAC peaks, at approximately 200bp and 400bp.

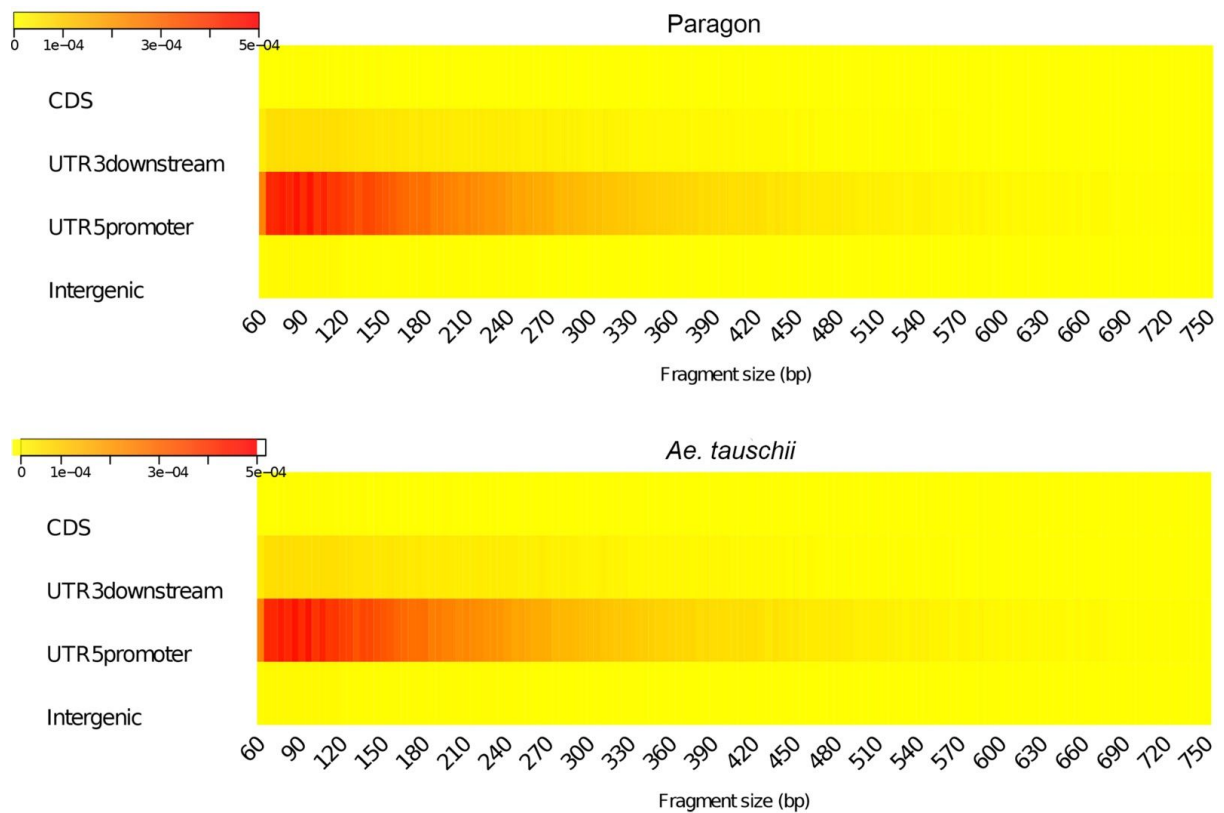

**Figure S5 Normalised read enrichments for four classes of chromosome states in *Triticum aestivum* Paragon and *Aegilops tauschii* AL8/78.**

The normalised density plots of ATAC peaks showed that 5'UTR + promoter (2kb) regions had the highest read densities, followed by 3' UTR + downstream (2kb) regions, CDS + intron regions and intergenic regions.

**Table S1 Summary of repetitive elements of *Triticum aestivum* Chinese Spring 3DL and *Aegilops tauschii* AL8/78 3L**

| Class                      | Subclass  | <i>Triticum aestivum</i><br>chr3DL |               | <i>Aegilops tauschii</i><br>chr3L |               |
|----------------------------|-----------|------------------------------------|---------------|-----------------------------------|---------------|
|                            |           | Length (bp)                        | Percentage    | Length (bp)                       | Percentage    |
| <b>DNA transposon</b>      |           | 45,694,659                         | 12.29%        | 47,299,305                        | 12.54%        |
|                            | CMC-ENSPM | 41,305,883                         | 11.11%        | 42,925,528                        | 11.38%        |
| <b>LINE</b>                |           | 1,670,347                          | 0.45%         | 1,651,400                         | 0.44%         |
| <b>LTR retrotransposon</b> |           | 191,094,703                        | 51.40%        | 198,840,503                       | 52.70%        |
|                            | LTR-Copia | 56,109,154                         | 15.09%        | 57,910,706                        | 15.35%        |
|                            | LTR-Gypsy | 103,525,917                        | 27.85%        | 108,703,865                       | 28.81%        |
| <b>MobileElement</b>       |           | 956                                | 0.00%         | 847                               | 0.00%         |
| <b>RC</b>                  |           | 58,706                             | 0.02%         | 73,186                            | 0.02%         |
| <b>rRNA</b>                |           | 19,149                             | 0.01%         | 17,408                            | 0.00%         |
| <b>Simple_repeat</b>       |           | 1,493,362                          | 0.40%         | 1,599,416                         | 0.42%         |
| <b>Low_complexity</b>      |           | 336,380                            | 0.09%         | 345,552                           | 0.09%         |
| <b>Other</b>               |           | 20,280,094                         | 5.46%         | 21,132,447                        | 5.60%         |
| <b>SUM</b>                 |           | <b>257806071</b>                   | <b>69.35%</b> | <b>267937996</b>                  | <b>71.01%</b> |

**Table S2 Number of RNAseq read pairs after trimming in 5 sampled tissues of *Triticum aestivum* Paragon and *Aegilops tauschii* AL8/78**

| <b>Tissues</b>  | <b>Replicates</b> | <b>Paragon</b> | <b>AL8/78</b> |
|-----------------|-------------------|----------------|---------------|
| Leaves          | Replicate 1       | 56,816,727     | 50,677,603    |
|                 | Replicate 2       | 56,452,015     | 55,377,053    |
|                 | Replicate 3       | 38,670,428     | 57,634,414    |
| Roots           | Replicate 1       | 38,735,310     | 52,677,010    |
|                 | Replicate 2       | 51,869,501     | 55,016,084    |
|                 | Replicate 3       | 50,896,607     | 53,365,111    |
| Grains (10dd)   | Replicate 1       | 59,835,166     | 80,624,534    |
|                 | Replicate 2       | 66,214,312     | 77,159,911    |
|                 | Replicate 3       | 57,335,248     | 68,751,597    |
| Grains (27dd)   | Replicate 1       | 55,984,207     | 88,885,636    |
|                 | Replicate 2       | 51,331,203     | 75,465,851    |
|                 | Replicate 3       | 74,165,822     | 80,256,130    |
| Grains (Pooled) | Replicate 1       | 63,778,882     | 60,647,054    |
| Seedling (4dd)  | Replicate 1       | 63,782,697     | 74,531,986    |
|                 | Replicate 2       | 77,936,789     | 71,175,660    |
|                 | Replicate 3       | 75,481,500     | 57,043,451    |



**Table S3 Number of differential expressed genes in 5 tissues between *Triticum aestivum* Paragon and *Aegilops tauschii* AL8/78**

|                         | Expressed genes | DEGs                   | Pseudogenes |
|-------------------------|-----------------|------------------------|-------------|
| Developing grain (10dd) | 1,716           | 277 (up 147, down 130) | 44          |
| Developing grain (27dd) | 1,516           | 173 (up 86, down 87)   | 38          |
| Leaf                    | 1,564           | 262 (up 112, down 150) | 42          |
| Root                    | 1,784           | 327 (up 176, down 151) | 44          |
| Seedling                | 1,829           | 251 (up 144, down 107) | 47          |
| Sum                     | 2,375           | 674                    | 66          |

**Table S4 Mapping statistics after alignment of bisulfite treated *Triticum aestivum* Paragon and *Ae. tauschii* AL8/78 samples**

|                                           | <b>Paragon</b> | <b><i>Ae. tauschii</i></b> |
|-------------------------------------------|----------------|----------------------------|
| Number of genes mapped                    | 2,810          | 3,997                      |
| C sites mapped on genes (min 10X)         | 846,450        | 458,347                    |
| C sites mapped on 3DL promoters (min 10X) | 418,818        | 289,521                    |
| C's methylated overall                    |                |                            |
| CpG                                       | 89.9%          | 87.1%                      |
| CHG                                       | 59.4%          | 53.4%                      |
| CHH                                       | 3.8%           | 3.5%                       |
| C's methylated genes                      |                |                            |
| CpG                                       | 66.7%          | 41.2%                      |
| CHG                                       | 13.2%          | 18.9%                      |
| CHH                                       | 1.0%           | 3.8%                       |
| % converted                               | 98.7           | 98.6                       |

**Table S5** Number of regions for methylation analysis in *Triticum aestivum* Paragon 3DL and *Aegilops tauschii* AL8/78 3L

|              | <b>Paragon</b> | <b>AL8/78</b> | <b>Comparable regions</b> |
|--------------|----------------|---------------|---------------------------|
| Gene CpG     | 2,378          | 2,664         | 1,533                     |
| Gene CHG     | 2,467          | 2,643         | 1,586                     |
| Gene CHH     | 2,706          | 2,932         | 1,913                     |
| Promoter CpG | 1,703          | 2,308         | 891                       |
| Promoter CHG | 1,791          | 2,229         | 901                       |
| Promoter CHH | 2,174          | 2,703         | 1,353                     |

**Table S6 Summary of ATAC peaks and covered genes in different chromosome states of Paragon wheat and *Ae. tauschii* AL8/78**

|                  | Number of Peaks (Genes covered*) |                   |
|------------------|----------------------------------|-------------------|
|                  | Paragon                          | AL8/78            |
| 5'UTR+promoter   | 1,266 (1,098 genes)              | 1,739 (869 genes) |
| CDS+Intron       | 53 (42 genes)                    | 171 (130 genes)   |
| 3'UTR+downstream | 226 (211 genes)                  | 480 (350 genes)   |
| Intergenic       | 1,425                            | 2,570             |
| Total peaks      | 2,970 (1,187 genes)              | 4,960 (936 genes) |

\*All genes including non-syntenic genes

**Table S7 Number of syntenic genes covered by ATAC-seq peaks**

|                                    | <b>Paragon</b>       | <b>AL8/78</b> |
|------------------------------------|----------------------|---------------|
| Overall gene pairs                 | 930 genes (159 DEGs) |               |
| Total                              | 774 (128 DEGs)       | 362(88 DEGs)  |
| CDS                                | 25(1 DEGs)           | 46(13 DEGs)   |
| UTR3downstream                     | 157(27 DEGs)         | 132(35 DEGs)  |
| UTR5promoter                       | 727(125 DEGs)        | 345(85 DEGs)  |
| Gene pairs with differential peaks | 816 genes (133 DEGs) |               |
| CDS                                | 69 (14 DEGs)         |               |
| UTR3downstream                     | 251 (52 DEGs)        |               |
| UTR5promoter                       | 684 (98 DEGs)        |               |

**Table S8 Protein sequences used to evidence the exons in wheat chromosome 3DL annotation**

| <b>Species</b>                 | <b>Version</b>  | <b>Number</b> | <b>Sources</b>                                                              |
|--------------------------------|-----------------|---------------|-----------------------------------------------------------------------------|
| <i>Aegilops tauschii</i>       | GCA_000347335.1 | 33,928        | Ensembl-25                                                                  |
| <i>Arabidopsis thaliana</i>    | TAIR10          | 35,386        | Ensembl-25                                                                  |
| <i>Brachypodium distachyon</i> | v1.0            | 31,029        | Ensembl-25                                                                  |
| <i>Oryza sativa</i>            | IRGSP-1.0       | 42,132        | Ensembl-25                                                                  |
| <i>Sorghium bicolor</i>        | Sorbi1          | 36,338        | Ensembl-25                                                                  |
| <i>Triticum urartu</i>         | GCA_000347455.1 | 33,483        | Ensembl-25                                                                  |
| <i>Hordeum vulgare</i>         | 082214v1        | 62,311        | Ensembl-25                                                                  |
| <i>Triticum aestivum</i>       | IWGSC2          | 99,354        | Ensembl-25                                                                  |
| <i>Triticum aestivum</i>       | TriFLDB         | 43,150        | <a href="http://trifldb.psc.riken.jp/v3">http://trifldb.psc.riken.jp/v3</a> |
| <i>Zea mays</i>                | AGPv3           | 63,235        | Ensembl-25                                                                  |
